# Supplementary material for: Nuclear High Mobility Group A2 (HMGA2) Interactome Revealed by Biotin Proximity Labeling
Source: MDPI journal article supplement (doi:10.3390/ijms24044246), 2023-02-20
Supplement: s1 [file s1]

| ID            | Term                                                                                                      | Ontology Source               | Term PValue | Term PValue Corrected with Benjamini-Hochberg | Group PValue | Group PValue Corrected with Benjamini-Hochberg | GO Groups | % Associated Genes | Nr. Genes | Associated Genes Found                                              |
|---------------|-----------------------------------------------------------------------------------------------------------|-------------------------------|-------------|-----------------------------------------------|--------------|------------------------------------------------|-----------|--------------------|-----------|---------------------------------------------------------------------|
| R-HSA:461585  | SUMOylation of DNA replication proteins                                                                   | REACTOME Pathways_25.0.5.2022 | 8.31E-04    | 8.55E-04                                      | 8.31E-04     | 8.31E-04                                       | Group 0   | 6.67               | 3.00      | [CDCA8, TOP2A, TOP2B]                                               |
| R-HSA:162587  | HIV Life Cycle                                                                                            | REACTOME Pathways_25.0.5.2022 | 3.12E-05    | 5.21E-05                                      | 5.11E-06     | 7.15E-06                                       | Group 1   | 4.03               | 6.00      | [GTF2B, PSIP1, SSRP1, SUPT16H, XRCC5, XRCC6]                        |
| R-HSA:167172  | Transcription of the HIV genome                                                                           | REACTOME Pathways_25.0.5.2022 | 2.98E-03    | 2.98E-03                                      | 5.11E-06     | 7.15E-06                                       | Group 1   | 4.29               | 3.00      | [GTF2B, SSRP1, SUPT16H]                                             |
| R-HSA:6796648 | TP53 Regulates Transcription of DNA Repair Genes                                                          | REACTOME Pathways_25.0.5.2022 | 2.11E-03    | 2.14E-03                                      | 5.11E-06     | 7.15E-06                                       | Group 1   | 4.84               | 3.00      | [MDC1, SSRP1, SUPT16H]                                              |
| R-HSA:162587  | HIV Life Cycle                                                                                            | REACTOME Pathways_25.0.5.2022 | 3.12E-05    | 5.21E-05                                      | 3.12E-05     | 3.64E-05                                       | Group 2   | 4.03               | 6.00      | [GTF2B, PSIP1, SSRP1, SUPT16H, XRCC5, XRCC6]                        |
| R-HSA:162592  | Integration of provirus                                                                                   | REACTOME Pathways_25.0.5.2022 | 5.46E-06    | 1.47E-05                                      | 3.12E-05     | 3.64E-05                                       | Group 2   | 33.33              | 3.00      | [PSIP1, XRCC5, XRCC6]                                               |
| R-HSA:162594  | Early Phase of HIV Life Cycle                                                                             | REACTOME Pathways_25.0.5.2022 | 2.33E-05    | 4.29E-05                                      | 3.12E-05     | 3.64E-05                                       | Group 2   | 21.43              | 3.00      | [PSIP1, XRCC5, XRCC6]                                               |
| R-HSA:164843  | 2-LTR circle formation                                                                                    | REACTOME Pathways_25.0.5.2022 | 2.29E-06    | 6.67E-06                                      | 3.12E-05     | 3.64E-05                                       | Group 2   | 42.86              | 3.00      | [PSIP1, XRCC5, XRCC6]                                               |
| R-HSA:167172  | Transcription of the HIV genome                                                                           | REACTOME Pathways_25.0.5.2022 | 2.98E-03    | 2.98E-03                                      | 3.12E-05     | 3.64E-05                                       | Group 2   | 4.29               | 3.00      | [GTF2B, SSRP1, SUPT16H]                                             |
| R-HSA:157579  | Telomere Maintenance                                                                                      | REACTOME Pathways_25.0.5.2022 | 6.43E-06    | 1.50E-05                                      | 9.65E-12     | 1.69E-11                                       | Group 3   | 5.31               | 6.00      | [ATRX, H2AC14, H2AC6, H2BC13, H4-16, RFC1]                          |
| R-HSA:5693532 | DNA Double-Strand Break Repair                                                                            | REACTOME Pathways_25.0.5.2022 | 1.18E-09    | 8.24E-08                                      | 9.65E-12     | 1.69E-11                                       | Group 3   | 5.95               | 10.00     | [BAZ1B, H2BC13, H4-16, LIG3, MDC1, PARP1, RFC1, RIF1, XRCC5, XRCC6] |
| R-HSA:5693538 | Homology Directed Repair                                                                                  | REACTOME Pathways_25.0.5.2022 | 2.02E-05    | 3.83E-05                                      | 9.65E-12     | 1.69E-11                                       | Group 3   | 4.35               | 6.00      | [H2BC13, H4-16, LIG3, MDC1, PARP1, RFC1]                            |
| R-HSA:5693565 | Recruitment and ATM-mediated phosphorylation of repair and signaling proteins at DNA double strand breaks | REACTOME Pathways_25.0.5.2022 | 2.77E-04    | 3.03E-04                                      | 9.65E-12     | 1.69E-11                                       | Group 3   | 5.19               | 4.00      | [BAZ1B, H2BC13, H4-16, MDC1]                                        |
| R-HSA:5693571 | Nonhomologous End-Joining (NHEJ)                                                                          | REACTOME Pathways_25.0.5.2022 | 3.20E-07    | 1.49E-06                                      | 9.65E-12     | 1.69E-11                                       | Group 3   | 8.82               | 6.00      | [H2BC13, H4-16, MDC1, RIF1, XRCC5, XRCC6]                           |
| R-HSA:5693606 | DNA Double Strand Break Response                                                                          | REACTOME Pathways_25.0.5.2022 | 2.91E-04    | 3.14E-04                                      | 9.65E-12     | 1.69E-11                                       | Group 3   | 5.13               | 4.00      | [BAZ1B, H2BC13, H4-16, MDC1]                                        |
| R-HSA:73884   | Base Excision Repair                                                                                      | REACTOME Pathways_25.0.5.2022 | 8.56E-08    | 5.99E-07                                      | 9.65E-12     | 1.69E-11                                       | Group 3   | 7.61               | 7.00      | [H2AC14, H2AC6, H2BC13, H4-16, LIG3, PARP1, RFC1]                   |
| R-HSA:73933   | Resolution of Abasic Sites (AP sites)                                                                     | REACTOME Pathways_25.0.5.2022 | 5.44E-04    | 5.69E-04                                      | 9.65E-12     | 1.69E-11                                       | Group 3   | 7.69               | 3.00      | [LIG3, PARP1, RFC1]                                                 |

S1a

| ID            | Term                                                   | Ontology Source               | Term PValue | Term PValue Corrected with Benjamini-Hochberg | Group PValue | Group PValue Corrected with Benjamini-Hochberg | GO Groups | % Associated Genes | Nr. Genes | Associated Genes Found                                              |
|---------------|--------------------------------------------------------|-------------------------------|-------------|-----------------------------------------------|--------------|------------------------------------------------|-----------|--------------------|-----------|---------------------------------------------------------------------|
| R-HSA:1221632 | Meiotic synapsis                                       | REACTOME Pathways_25 .05.2022 | 2.95E-08    | 3.44E-07                                      | 3.94E-12     | 1.38E-11                                       | Group 4   | 8.86               | 7.00      | [H2AC14, H2AC6, H2BC13, H4-16, RAD21, SMC3, STAG2]                  |
| R-HSA:1474165 | Reproduction                                           | REACTOME Pathways_25 .05.2022 | 1.04E-07    | 6.65E-07                                      | 3.94E-12     | 1.38E-11                                       | Group 4   | 5.59               | 8.00      | [H2AC14, H2AC6, H2BC13, H3C13, H4-16, RAD21, SMC3, STAG2]           |
| R-HSA:1500620 | Meiosis                                                | REACTOME Pathways_25 .05.2022 | 2.32E-08    | 3.25E-07                                      | 3.94E-12     | 1.38E-11                                       | Group 4   | 6.78               | 8.00      | [H2AC14, H2AC6, H2BC13, H3C13, H4-16, RAD21, SMC3, STAG2]           |
| R-HSA:2468052 | Establishment of Sister Chromatid Cohesion             | REACTOME Pathways_25 .05.2022 | 8.24E-08    | 6.41E-07                                      | 3.94E-12     | 1.38E-11                                       | Group 4   | 36.36              | 4.00      | [PDS5A, RAD21, SMC3, STAG2]                                         |
| R-HSA:2470946 | Cohesin Loading onto Chromatin                         | REACTOME Pathways_25 .05.2022 | 5.26E-08    | 4.60E-07                                      | 3.94E-12     | 1.38E-11                                       | Group 4   | 40.00              | 4.00      | [PDS5A, RAD21, SMC3, STAG2]                                         |
| R-HSA:2500257 | Resolution of Sister Chromatid Cohesion                | REACTOME Pathways_25 .05.2022 | 7.43E-07    | 2.89E-06                                      | 3.94E-12     | 1.38E-11                                       | Group 4   | 5.56               | 7.00      | [AHCTF1, CDCA8, PDS5A, RAD21, RCC2, SMC3, STAG2]                    |
| R-HSA:2990846 | SUMOylation                                            | REACTOME Pathways_25 .05.2022 | 3.52E-09    | 6.16E-08                                      | 3.94E-12     | 1.38E-11                                       | Group 4   | 5.32               | 10.00     | [CBX5, CDCA8, H4-16, MDC1, PARP1, RAD21, SMC3, STAG2, TOP2A, TOP2B] |
| R-HSA:3108214 | SUMOylation of DNA damage response and repair proteins | REACTOME Pathways_25 .05.2022 | 1.52E-05    | 2.96E-05                                      | 3.94E-12     | 1.38E-11                                       | Group 4   | 6.49               | 5.00      | [MDC1, PARP1, RAD21, SMC3, STAG2]                                   |
| R-HSA:3108232 | SUMO E3 ligases SUMOylate target proteins              | REACTOME Pathways_25 .05.2022 | 2.57E-09    | 6.00E-08                                      | 3.94E-12     | 1.38E-11                                       | Group 4   | 5.49               | 10.00     | [CBX5, CDCA8, H4-16, MDC1, PARP1, RAD21, SMC3, STAG2, TOP2A, TOP2B] |
| R-HSA:68884   | Mitotic Telophase/Cytokinesis                          | REACTOME Pathways_25 .05.2022 | 1.78E-07    | 9.56E-07                                      | 3.94E-12     | 1.38E-11                                       | Group 4   | 30.77              | 4.00      | [PDS5A, RAD21, SMC3, STAG2]                                         |
| R-HSA:9018519 | Estrogen-dependent gene expression                     | REACTOME Pathways_25 .05.2022 | 1.51E-07    | 8.83E-07                                      | 3.94E-12     | 1.38E-11                                       | Group 4   | 5.33               | 8.00      | [H2AC14, H2AC6, H2BC13, H3C13, H4-16, RAD21, SMC3, STAG2]           |

S1b

| ID            | Term                                                                                                      | Ontology Source               | Term PValue | Term PValue Corrected with Benjamini-Hochberg | Group PValue | Group PValue Corrected with Benjamini-Hochberg | GO Groups | % Associated Genes | Nr. Genes | Associated Genes Found                                              |
|---------------|-----------------------------------------------------------------------------------------------------------|-------------------------------|-------------|-----------------------------------------------|--------------|------------------------------------------------|-----------|--------------------|-----------|---------------------------------------------------------------------|
| R-HSA:110328  | Recognition and association of DNA glycosylase with site containing an affected pyrimidine                | REACTOME_Pathways_25.0.5.2022 | 1.12E-04    | 1.31E-04                                      | 7.66E-12     | 1.79E-11                                       | Group 5   | 6.56               | 4.00      | [H2AC14, H2AC6, H2BC13, H4-16]                                      |
| R-HSA:110329  | Cleavage of the damaged pyrimidine                                                                        | REACTOME_Pathways_25.0.5.2022 | 1.12E-04    | 1.31E-04                                      | 7.66E-12     | 1.79E-11                                       | Group 5   | 6.56               | 4.00      | [H2AC14, H2AC6, H2BC13, H4-16]                                      |
| R-HSA:110330  | Recognition and association of DNA glycosylase with site containing an affected purine                    | REACTOME_Pathways_25.0.5.2022 | 8.01E-05    | 1.04E-04                                      | 7.66E-12     | 1.79E-11                                       | Group 5   | 7.14               | 4.00      | [H2AC14, H2AC6, H2BC13, H4-16]                                      |
| R-HSA:110331  | Cleavage of the damaged purine                                                                            | REACTOME_Pathways_25.0.5.2022 | 8.01E-05    | 1.04E-04                                      | 7.66E-12     | 1.79E-11                                       | Group 5   | 7.14               | 4.00      | [H2AC14, H2AC6, H2BC13, H4-16]                                      |
| R-HSA:171306  | Packaging Of Telomere Ends                                                                                | REACTOME_Pathways_25.0.5.2022 | 5.98E-05    | 8.37E-05                                      | 7.66E-12     | 1.79E-11                                       | Group 5   | 7.69               | 4.00      | [H2AC14, H2AC6, H2BC13, H4-16]                                      |
| R-HSA:212165  | Epigenetic regulation of gene expression                                                                  | REACTOME_Pathways_25.0.5.2022 | 2.30E-06    | 6.44E-06                                      | 7.66E-12     | 1.79E-11                                       | Group 5   | 4.70               | 7.00      | [BAZ1B, CBX3, H2AC14, H2AC6, H2BC13, H3C13, H4-16]                  |
| R-HSA:5250913 | Positive epigenetic regulation of rRNA expression                                                         | REACTOME_Pathways_25.0.5.2022 | 2.28E-07    | 1.14E-06                                      | 7.66E-12     | 1.79E-11                                       | Group 5   | 6.60               | 7.00      | [BAZ1B, CBX3, H2AC14, H2AC6, H2BC13, H3C13, H4-16]                  |
| R-HSA:5250924 | B-WICH complex positively regulates rRNA expression                                                       | REACTOME_Pathways_25.0.5.2022 | 1.81E-06    | 5.77E-06                                      | 7.66E-12     | 1.79E-11                                       | Group 5   | 6.59               | 6.00      | [BAZ1B, H2AC14, H2AC6, H2BC13, H3C13, H4-16]                        |
| R-HSA:5693532 | DNA Double-Strand Break Repair                                                                            | REACTOME_Pathways_25.0.5.2022 | 1.18E-09    | 8.24E-08                                      | 7.66E-12     | 1.79E-11                                       | Group 5   | 5.95               | 10.0      | [BAZ1B, H2BC13, H4-16, LIG3, MDC1, PARP1, RFC1, RIF1, XRCC5, XRCC6] |
| R-HSA:5693538 | Homology Directed Repair                                                                                  | REACTOME_Pathways_25.0.5.2022 | 2.02E-05    | 3.83E-05                                      | 7.66E-12     | 1.79E-11                                       | Group 5   | 4.35               | 6.00      | [H2BC13, H4-16, LIG3, MDC1, PARP1, RFC1]                            |
| R-HSA:5693565 | Recruitment and ATM-mediated phosphorylation of repair and signaling proteins at DNA double strand breaks | REACTOME_Pathways_25.0.5.2022 | 2.77E-04    | 3.03E-04                                      | 7.66E-12     | 1.79E-11                                       | Group 5   | 5.19               | 4.00      | [BAZ1B, H2BC13, H4-16, MDC1]                                        |
| R-HSA:5693571 | Nonhomologous End-Joining (NHEJ)                                                                          | REACTOME_Pathways_25.0.5.2022 | 3.20E-07    | 1.49E-06                                      | 7.66E-12     | 1.79E-11                                       | Group 5   | 8.82               | 6.00      | [H2BC13, H4-16, MDC1, RIF1, XRCC5, XRCC6]                           |
| R-HSA:5693606 | DNA Double Strand Break Response                                                                          | REACTOME_Pathways_25.0.5.2022 | 2.91E-04    | 3.14E-04                                      | 7.66E-12     | 1.79E-11                                       | Group 5   | 5.13               | 4.00      | [BAZ1B, H2BC13, H4-16, MDC1]                                        |
| R-HSA:73927   | Depurination                                                                                              | REACTOME_Pathways_25.0.5.2022 | 8.01E-05    | 1.04E-04                                      | 7.66E-12     | 1.79E-11                                       | Group 5   | 7.14               | 4.00      | [H2AC14, H2AC6, H2BC13, H4-16]                                      |
| R-HSA:73928   | Depyrimidination                                                                                          | REACTOME_Pathways_25.0.5.2022 | 1.12E-04    | 1.31E-04                                      | 7.66E-12     | 1.79E-11                                       | Group 5   | 6.56               | 4.00      | [H2AC14, H2AC6, H2BC13, H4-16]                                      |
| R-HSA:73929   | Base-Excision Repair, AP Site Formation                                                                   | REACTOME_Pathways_25.0.5.2022 | 1.27E-04    | 1.46E-04                                      | 7.66E-12     | 1.79E-11                                       | Group 5   | 6.35               | 4.00      | [H2AC14, H2AC6, H2BC13, H4-16]                                      |

S1c

| ID            | Term                                                                                       | Ontology Source               | Term PValue | Term PValue Corrected with Benjamin-Hochberg | Group PValue | Group PValue Corrected with Benjamin-Hochberg | GOL levels | GOG rous | % Associated Genes | Nr. Genes | Associated Genes Found                                    |
|---------------|--------------------------------------------------------------------------------------------|-------------------------------|-------------|----------------------------------------------|--------------|-----------------------------------------------|------------|----------|--------------------|-----------|-----------------------------------------------------------|
| R-HSA:110328  | Recognition and association of DNA glycosylase with site containing an affected pyrimidine | REACTOME_Pathways_2 5.05.2022 | 1.12E-04    | 1.31E-04                                     | 2.74E-18     | 1.92E-17[-1]                                  | Group 6    |          | 6.56               | 4.00      | [H2AC14, H2AC6, H2BC13, H4-16]                            |
| R-HSA:110329  | Cleavage of the damaged pyrimidine                                                         | REACTOME_Pathways_2 5.05.2022 | 1.12E-04    | 1.31E-04                                     | 2.74E-18     | 1.92E-17[-1]                                  | Group 6    |          | 6.56               | 4.00      | [H2AC14, H2AC6, H2BC13, H4-16]                            |
| R-HSA:110330  | Recognition and association of DNA glycosylase with site containing an affected purine     | REACTOME_Pathways_2 5.05.2022 | 8.01E-05    | 1.04E-04                                     | 2.74E-18     | 1.92E-17[-1]                                  | Group 6    |          | 7.14               | 4.00      | [H2AC14, H2AC6, H2BC13, H4-16]                            |
| R-HSA:110331  | Cleavage of the damaged purine                                                             | REACTOME_Pathways_2 5.05.2022 | 8.01E-05    | 1.04E-04                                     | 2.74E-18     | 1.92E-17[-1]                                  | Group 6    |          | 7.14               | 4.00      | [H2AC14, H2AC6, H2BC13, H4-16]                            |
| R-HSA:1221632 | Meiotic synapsis                                                                           | REACTOME_Pathways_2 5.05.2022 | 2.95E-08    | 3.44E-07                                     | 2.74E-18     | 1.92E-17[-1]                                  | Group 6    |          | 8.86               | 7.00      | [H2AC14, H2AC6, H2BC13, H4-16, RAD21, SMC3, STAG2]        |
| R-HSA:140342  | Apoptosis induced DNA fragmentation                                                        | REACTOME_Pathways_2 5.05.2022 | 1.21E-09    | 4.23E-08                                     | 2.74E-18     | 1.92E-17[-1]                                  | Group 6    |          | 38.46              | 5.00      | [H1-0, H1-2, H1-4, HMGB1, HMGB2]                          |
| R-HSA:1474165 | Reproduction                                                                               | REACTOME_Pathways_2 5.05.2022 | 1.04E-07    | 6.65E-07                                     | 2.74E-18     | 1.92E-17[-1]                                  | Group 6    |          | 5.59               | 8.00      | [H2AC14, H2AC6, H2BC13, H3C13, H4-16, RAD21, SMC3, STAG2] |
| R-HSA:1500620 | Meiosis                                                                                    | REACTOME_Pathways_2 5.05.2022 | 2.32E-08    | 3.25E-07                                     | 2.74E-18     | 1.92E-17[-1]                                  | Group 6    |          | 6.78               | 8.00      | [H2AC14, H2AC6, H2BC13, H3C13, H4-16, RAD21, SMC3, STAG2] |
| R-HSA:157579  | Telomere Maintenance                                                                       | REACTOME_Pathways_2 5.05.2022 | 6.43E-06    | 1.50E-05                                     | 2.74E-18     | 1.92E-17[-1]                                  | Group 6    |          | 5.31               | 6.00      | [ATRX, H2AC14, H2AC6, H2BC13, H4-16, RFC1]                |
| R-HSA:171306  | Packaging Of Telomere Ends                                                                 | REACTOME_Pathways_2 5.05.2022 | 5.98E-05    | 8.37E-05                                     | 2.74E-18     | 1.92E-17[-1]                                  | Group 6    |          | 7.69               | 4.00      | [H2AC14, H2AC6, H2BC13, H4-16]                            |
| R-HSA:1912408 | Pre-NOTCH Transcription and Translation                                                    | REACTOME_Pathways_2 5.05.2022 | 3.82E-05    | 5.81E-05                                     | 2.74E-18     | 1.92E-17[-1]                                  | Group 6    |          | 5.38               | 5.00      | [H2AC14, H2AC6, H2BC13, H3C13, H4-16]                     |
| R-HSA:1912422 | Pre-NOTCH Expression and Processing                                                        | REACTOME_Pathways_2 5.05.2022 | 8.17E-05    | 1.04E-04                                     | 2.74E-18     | 1.92E-17[-1]                                  | Group 6    |          | 4.59               | 5.00      | [H2AC14, H2AC6, H2BC13, H3C13, H4-16]                     |
| R-HSA:201722  | Formation of the beta-catenin/TCF transactivating complex                                  | REACTOME_Pathways_2 5.05.2022 | 3.44E-05    | 5.46E-05                                     | 2.74E-18     | 1.92E-17[-1]                                  | Group 6    |          | 5.49               | 5.00      | [H2AC14, H2AC6, H2BC13, H3C13, H4-16]                     |
| R-HSA:212165  | Epigenetic regulation of gene expression                                                   | REACTOME_Pathways_2 5.05.2022 | 2.30E-06    | 6.44E-06                                     | 2.74E-18     | 1.92E-17[-1]                                  | Group 6    |          | 4.70               | 7.00      | [BAZ1B, CBX3, H2AC14, H2AC6, H2BC13, H3C13, H4-16]        |
| R-HSA:212300  | PRC2 methylates histones and DNA                                                           | REACTOME_Pathways_2 5.05.2022 | 1.17E-05    | 2.41E-05                                     | 2.74E-18     | 1.92E-17[-1]                                  | Group 6    |          | 6.85               | 5.00      | [H2AC14, H2AC6, H2BC13, H3C13, H4-16]                     |
| R-HSA:2299718 | Condensation of Prophase Chromosomes                                                       | REACTOME_Pathways_2 5.05.2022 | 1.25E-05    | 2.51E-05                                     | 2.74E-18     | 1.92E-17[-1]                                  | Group 6    |          | 6.76               | 5.00      | [H2AC14, H2AC6, H2BC13, H3C13, H4-16]                     |
| R-HSA:2468052 | Establishment of Sister Chromatid Cohesion                                                 | REACTOME_Pathways_2 5.05.2022 | 8.24E-08    | 6.41E-07                                     | 2.74E-18     | 1.92E-17[-1]                                  | Group 6    |          | 36.36              | 4.00      | [PDSSA, RAD21, SMC3, STAG2]                               |
| R-HSA:2470946 | Cohesin Loading onto Chromatin                                                             | REACTOME_Pathways_2 5.05.2022 | 5.26E-08    | 4.60E-07                                     | 2.74E-18     | 1.92E-17[-1]                                  | Group 6    |          | 40.00              | 4.00      | [PDSSA, RAD21, SMC3, STAG2]                               |
| R-HSA:2559580 | Oxidative Stress Induced Senescence                                                        | REACTOME_Pathways_2 5.05.2022 | 1.56E-04    | 1.73E-04                                     | 2.74E-18     | 1.92E-17[-1]                                  | Group 6    |          | 4.00               | 5.00      | [H2AC14, H2AC6, H2BC13, H3C13, H4-16]                     |

S1d Cont.

| ID                    | Term                                                                                 | Ontology Source                | Term PValue | Term PValue Corrected with Benjamin-Hochberg | Group PValue | Group PValue Corrected with Benjamin-Hochberg | GOL evels | GOG rroups | % Associa ted Genes | Nr. Gen es | Associated Genes Found                                  |
|-----------------------|--------------------------------------------------------------------------------------|--------------------------------|-------------|----------------------------------------------|--------------|-----------------------------------------------|-----------|------------|---------------------|------------|---------------------------------------------------------|
| R-<br>HSA:255<br>9582 | Senescence-Associated Secretory Phenotype (SASP)                                     | REACTOME _Pathways_2 5.05.2022 | 9.29E-05    | 1.12E-04                                     | 2.74E-18     | 1.92E-17[-1]                                  | Group 6   |            | 4.46                | 5.00       | [H2AC14, H2AC6, H2BC13, H3C13, H4-16]                   |
| R-<br>HSA:255<br>9583 | Cellular Senescence                                                                  | REACTOME _Pathways_2 5.05.2022 | 1.21E-06    | 4.48E-06                                     | 2.74E-18     | 1.92E-17[-1]                                  | Group 6   |            | 4.06                | 8.00       | [H1-0, H1-2, H1-4, H2AC14, H2AC6, H2BC13, H3C13, H4-16] |
| R-<br>HSA:255<br>9584 | Formation of Senescence-Associated Heterochromatin Foci (SAHF)                       | REACTOME _Pathways_2 5.05.2022 | 3.56E-05    | 5.54E-05                                     | 2.74E-18     | 1.92E-17[-1]                                  | Group 6   |            | 18.75               | 3.00       | [H1-0, H1-2, H1-4]                                      |
| R-<br>HSA:255<br>9586 | DNA Damage/Telomere Stress Induced Senescence                                        | REACTOME _Pathways_2 5.05.2022 | 3.22E-08    | 3.22E-07                                     | 2.74E-18     | 1.92E-17[-1]                                  | Group 6   |            | 8.75                | 7.00       | [H1-0, H1-2, H1-4, H2AC14, H2AC6, H2BC13, H4-16]        |
| R-<br>HSA:310<br>8214 | SUMOylation of DNA damage response and repair proteins                               | REACTOME _Pathways_2 5.05.2022 | 1.52E-05    | 2.96E-05                                     | 2.74E-18     | 1.92E-17[-1]                                  | Group 6   |            | 6.49                | 5.00       | [MDC1, PARP1, RAD21, SMC3, STAG2]                       |
| R-<br>HSA:321<br>4815 | HDACs deacetylate histones                                                           | REACTOME _Pathways_2 5.05.2022 | 4.02E-05    | 5.98E-05                                     | 2.74E-18     | 1.92E-17[-1]                                  | Group 6   |            | 5.32                | 5.00       | [H2AC14, H2AC6, H2BC13, H3C13, H4-16]                   |
| R-<br>HSA:321<br>4847 | HATs acetylate histones                                                              | REACTOME _Pathways_2 5.05.2022 | 2.38E-05    | 4.27E-05                                     | 2.74E-18     | 1.92E-17[-1]                                  | Group 6   |            | 4.23                | 6.00       | [H2AC14, H2AC6, H2BC13, H3C13, H4-16, HAT1]             |
| R-<br>HSA:321<br>4858 | RMTs methylate histone arginines                                                     | REACTOME _Pathways_2 5.05.2022 | 3.06E-04    | 3.24E-04                                     | 2.74E-18     | 1.92E-17[-1]                                  | Group 6   |            | 5.06                | 4.00       | [H2AC14, H2AC6, H3C13, H4-16]                           |
| R-<br>HSA:427<br>359  | SIRT1 negatively regulates rRNA expression                                           | REACTOME _Pathways_2 5.05.2022 | 8.26E-06    | 1.75E-05                                     | 2.74E-18     | 1.92E-17[-1]                                  | Group 6   |            | 7.35                | 5.00       | [H2AC14, H2AC6, H2BC13, H3C13, H4-16]                   |
| R-<br>HSA:427<br>389  | ERCC6 (CSB) and EHM2 (G9a) positively regulate rRNA expression                       | REACTOME _Pathways_2 5.05.2022 | 6.23E-07    | 2.57E-06                                     | 2.74E-18     | 1.92E-17[-1]                                  | Group 6   |            | 7.89                | 6.00       | [CBX3, H2AC14, H2AC6, H2BC13, H3C13, H4-16]             |
| R-<br>HSA:427<br>413  | NoRC negatively regulates rRNA expression                                            | REACTOME _Pathways_2 5.05.2022 | 7.48E-05    | 9.87E-05                                     | 2.74E-18     | 1.92E-17[-1]                                  | Group 6   |            | 4.67                | 5.00       | [H2AC14, H2AC6, H2BC13, H3C13, H4-16]                   |
| R-<br>HSA:525<br>0913 | Positive epigenetic regulation of rRNA expression                                    | REACTOME _Pathways_2 5.05.2022 | 2.28E-07    | 1.14E-06                                     | 2.74E-18     | 1.92E-17[-1]                                  | Group 6   |            | 6.60                | 7.00       | [BAZ1B, CBX3, H2AC14, H2AC6, H2BC13, H3C13, H4-16]      |
| R-<br>HSA:525<br>0924 | B-WICH complex positively regulates rRNA expression                                  | REACTOME _Pathways_2 5.05.2022 | 1.81E-06    | 5.77E-06                                     | 2.74E-18     | 1.92E-17[-1]                                  | Group 6   |            | 6.59                | 6.00       | [BAZ1B, H2AC14, H2AC6, H2BC13, H3C13, H4-16]            |
| R-<br>HSA:525<br>0941 | Negative epigenetic regulation of rRNA expression                                    | REACTOME _Pathways_2 5.05.2022 | 8.53E-05    | 1.07E-04                                     | 2.74E-18     | 1.92E-17[-1]                                  | Group 6   |            | 4.55                | 5.00       | [H2AC14, H2AC6, H2BC13, H3C13, H4-16]                   |
| R-<br>HSA:533<br>4118 | DNA methylation                                                                      | REACTOME _Pathways_2 5.05.2022 | 6.61E-06    | 1.49E-05                                     | 2.74E-18     | 1.92E-17[-1]                                  | Group 6   |            | 7.69                | 5.00       | [H2AC14, H2AC6, H2BC13, H3C13, H4-16]                   |
| R-<br>HSA:557<br>8749 | Transcriptional regulation by small RNAs                                             | REACTOME _Pathways_2 5.05.2022 | 7.15E-05    | 9.62E-05                                     | 2.74E-18     | 1.92E-17[-1]                                  | Group 6   |            | 4.72                | 5.00       | [H2AC14, H2AC6, H2BC13, H3C13, H4-16]                   |
| R-<br>HSA:561<br>7472 | Activation of anterior HOX genes in hindbrain development during early embryogenesis | REACTOME _Pathways_2 5.05.2022 | 1.34E-04    | 1.51E-04                                     | 2.74E-18     | 1.92E-17[-1]                                  | Group 6   |            | 4.13                | 5.00       | [H2AC14, H2AC6, H2BC13, H3C13, H4-16]                   |
| R-<br>HSA:561<br>9507 | Activation of HOX genes during differentiation                                       | REACTOME _Pathways_2 5.05.2022 | 1.34E-04    | 1.51E-04                                     | 2.74E-18     | 1.92E-17[-1]                                  | Group 6   |            | 4.13                | 5.00       | [H2AC14, H2AC6, H2BC13, H3C13, H4-16]                   |
| R-<br>HSA:562<br>5740 | RHO GTPases activate PKNs                                                            | REACTOME _Pathways_2 5.05.2022 | 4.23E-05    | 6.17E-05                                     | 2.74E-18     | 1.92E-17[-1]                                  | Group 6   |            | 5.26                | 5.00       | [H2AC14, H2AC6, H2BC13, H3C13, H4-16]                   |

S1d Cont.

| ID            | Term                                                                                                      | Ontology Source               | Term PValue | Term PValue Corrected with Benjamin-Hochberg | Group PValue | Group PValue Corrected with Benjamin-Hochberg | GOL levels | GOG rous | % Associa ted Genes | Nr. Genes | Associated Genes Found                                              |
|---------------|-----------------------------------------------------------------------------------------------------------|-------------------------------|-------------|----------------------------------------------|--------------|-----------------------------------------------|------------|----------|---------------------|-----------|---------------------------------------------------------------------|
| R-HSA:5625886 | Activated PKNI stimulates transcription of AR (androgen receptor) regulated genes KLK2 and KLK3           | REACTOME_Pathways_2 5.05.2022 | 7.68E-06    | 1.68E-05                                     | 2.74E-18     | 1.92E-17[-1]                                  | Group 6    |          | 7.46                | 5.00      | [H2AC14, H2AC6, H2BC13, H3C13, H4-16]                               |
| R-HSA:5693532 | DNA Double-Strand Break Repair                                                                            | REACTOME_Pathways_2 5.05.2022 | 1.18E-09    | 8.24E-08                                     | 2.74E-18     | 1.92E-17[-1]                                  | Group 6    |          | 5.95                | 10.0      | [BAZ1B, H2BC13, H4-16, LIG3, MDC1, PARP1, RFC1, RIF1, XRCC5, XRCC6] |
| R-HSA:5693538 | Homology Directed Repair                                                                                  | REACTOME_Pathways_2 5.05.2022 | 2.02E-05    | 3.83E-05                                     | 2.74E-18     | 1.92E-17[-1]                                  | Group 6    |          | 4.35                | 6.00      | [H2BC13, H4-16, LIG3, MDC1, PARP1, RFC1]                            |
| R-HSA:5693565 | Recruitment and ATM-mediated phosphorylation of repair and signaling proteins at DNA double strand breaks | REACTOME_Pathways_2 5.05.2022 | 2.77E-04    | 3.03E-04                                     | 2.74E-18     | 1.92E-17[-1]                                  | Group 6    |          | 5.19                | 4.00      | [BAZ1B, H2BC13, H4-16, MDC1]                                        |
| R-HSA:5693606 | DNA Double Strand Break Response                                                                          | REACTOME_Pathways_2 5.05.2022 | 2.91E-04    | 3.14E-04                                     | 2.74E-18     | 1.92E-17[-1]                                  | Group 6    |          | 5.13                | 4.00      | [BAZ1B, H2BC13, H4-16, MDC1]                                        |
| R-HSA:606279  | Deposition of new CENPA-containing nucleosomes at the centromere                                          | REACTOME_Pathways_2 5.05.2022 | 1.25E-05    | 2.51E-05                                     | 2.74E-18     | 1.92E-17[-1]                                  | Group 6    |          | 6.76                | 5.00      | [H2AC14, H2AC6, H2BC13, H4-16, RSF1]                                |
| R-HSA:68616   | Assembly of the ORC complex at the origin of replication                                                  | REACTOME_Pathways_2 5.05.2022 | 3.49E-07    | 1.53E-06                                     | 2.74E-18     | 1.92E-17[-1]                                  | Group 6    |          | 8.70                | 6.00      | [H2AC14, H2AC6, H2BC13, H3C13, H4-16, ORC2]                         |
| R-HSA:68867   | Assembly of the pre-replicative complex                                                                   | REACTOME_Pathways_2 5.05.2022 | 2.48E-05    | 4.33E-05                                     | 2.74E-18     | 1.92E-17[-1]                                  | Group 6    |          | 4.20                | 6.00      | [H2AC14, H2AC6, H2BC13, H3C13, H4-16, ORC2]                         |
| R-HSA:68875   | Mitotic Prophase                                                                                          | REACTOME_Pathways_2 5.05.2022 | 1.67E-06    | 5.55E-06                                     | 2.74E-18     | 1.92E-17[-1]                                  | Group 6    |          | 4.93                | 7.00      | [H2AC14, H2AC6, H2BC13, H3C13, H4-16, NUMA1, TMPO]                  |
| R-HSA:68884   | Mitotic Telophase/Cytokinesis                                                                             | REACTOME_Pathways_2 5.05.2022 | 1.78E-07    | 9.56E-07                                     | 2.74E-18     | 1.92E-17[-1]                                  | Group 6    |          | 30.77               | 4.00      | [PDS5A, RAD21, SMC3, STAG2]                                         |
| R-HSA:73728   | RNA Polymerase I Promoter Opening                                                                         | REACTOME_Pathways_2 5.05.2022 | 5.66E-06    | 1.41E-05                                     | 2.74E-18     | 1.92E-17[-1]                                  | Group 6    |          | 7.94                | 5.00      | [H2AC14, H2AC6, H2BC13, H3C13, H4-16]                               |
| R-HSA:73772   | RNA Polymerase I Promoter Escape                                                                          | REACTOME_Pathways_2 5.05.2022 | 1.81E-06    | 5.77E-06                                     | 2.74E-18     | 1.92E-17[-1]                                  | Group 6    |          | 6.59                | 6.00      | [CBX3, H2AC14, H2AC6, H2BC13, H3C13, H4-16]                         |
| R-HSA:73854   | RNA Polymerase I Promoter Clearance                                                                       | REACTOME_Pathways_2 5.05.2022 | 5.50E-06    | 1.43E-05                                     | 2.74E-18     | 1.92E-17[-1]                                  | Group 6    |          | 5.45                | 6.00      | [CBX3, H2AC14, H2AC6, H2BC13, H3C13, H4-16]                         |
| R-HSA:73864   | RNA Polymerase I Transcription                                                                            | REACTOME_Pathways_2 5.05.2022 | 6.10E-06    | 1.47E-05                                     | 2.74E-18     | 1.92E-17[-1]                                  | Group 6    |          | 5.36                | 6.00      | [CBX3, H2AC14, H2AC6, H2BC13, H3C13, H4-16]                         |
| R-HSA:73884   | Base Excision Repair                                                                                      | REACTOME_Pathways_2 5.05.2022 | 8.56E-08    | 5.99E-07                                     | 2.74E-18     | 1.92E-17[-1]                                  | Group 6    |          | 7.61                | 7.00      | [H2AC14, H2AC6, H2BC13, H4-16, LIG3, PARP1, RFC1]                   |
| R-HSA:73886   | Chromosome Maintenance                                                                                    | REACTOME_Pathways_2 5.05.2022 | 1.59E-06    | 5.56E-06                                     | 2.74E-18     | 1.92E-17[-1]                                  | Group 6    |          | 4.96                | 7.00      | [ATRX, H2AC14, H2AC6, H2BC13, H4-16, RFC1, RSF1]                    |
| R-HSA:73927   | Depurination                                                                                              | REACTOME_Pathways_2 5.05.2022 | 8.01E-05    | 1.04E-04                                     | 2.74E-18     | 1.92E-17[-1]                                  | Group 6    |          | 7.14                | 4.00      | [H2AC14, H2AC6, H2BC13, H4-16]                                      |
| R-HSA:73928   | Depyrimidination                                                                                          | REACTOME_Pathways_2 5.05.2022 | 1.12E-04    | 1.31E-04                                     | 2.74E-18     | 1.92E-17[-1]                                  | Group 6    |          | 6.56                | 4.00      | [H2AC14, H2AC6, H2BC13, H4-16]                                      |
| R-HSA:73929   | Base-Excision Repair, AP Site Formation                                                                   | REACTOME_Pathways_2 5.05.2022 | 1.27E-04    | 1.46E-04                                     | 2.74E-18     | 1.92E-17[-1]                                  | Group 6    |          | 6.35                | 4.00      | [H2AC14, H2AC6, H2BC13, H4-16]                                      |

S1d Cont.

| ID            | Term                                                                                  | Ontology Source               | Term PValue | Term PValue Corrected with Benjamin i-Hochberg | Group PValue | Group PValue Corrected with Benjamin i-Hochberg | GOL levels | GOG rous | % Associa ted Genes | Nr. Gen es | Associated Genes Found                                    |
|---------------|---------------------------------------------------------------------------------------|-------------------------------|-------------|------------------------------------------------|--------------|-------------------------------------------------|------------|----------|---------------------|------------|-----------------------------------------------------------|
| R-HSA-73933   | Resolution of Abasic Sites (AP sites)                                                 | REACTOME_Pathways_2 5.05.2022 | 5.44E-04    | 5.69E-04                                       | 2.74E-18     | 1.92E-17[-1]                                    | Group 6    |          | 7.69                | 3.00       | [LIG3, PARP1, RFC1]                                       |
| R-HSA-75153   | Apoptotic execution phase                                                             | REACTOME_Pathways_2 5.05.2022 | 2.16E-06    | 6.59E-06                                       | 2.74E-18     | 1.92E-17[-1]                                    | Group 6    |          | 9.62                | 5.00       | [H1-0, H1-2, H1-4, HMGB1, HMGB2]                          |
| R-HSA-774815  | Nucleosome assembly                                                                   | REACTOME_Pathways_2 5.05.2022 | 1.25E-05    | 2.51E-05                                       | 2.74E-18     | 1.92E-17[-1]                                    | Group 6    |          | 6.76                | 5.00       | [H2AC14, H2AC6, H2BC13, H4-16, RSF1]                      |
| R-HSA-8936459 | RUNX1 regulates genes involved in megakaryocyte differentiation and platelet function | REACTOME_Pathways_2 5.05.2022 | 4.67E-05    | 6.68E-05                                       | 2.74E-18     | 1.92E-17[-1]                                    | Group 6    |          | 5.15                | 5.00       | [H2AC14, H2AC6, H2BC13, H3C13, H4-16]                     |
| R-HSA-9018519 | Estrogen-dependent gene expression                                                    | REACTOME_Pathways_2 5.05.2022 | 1.51E-07    | 8.83E-07                                       | 2.74E-18     | 1.92E-17[-1]                                    | Group 6    |          | 5.33                | 8.00       | [H2AC14, H2AC6, H2BC13, H3C13, H4-16, RAD21, SMC3, STAG2] |
| R-HSA-912446  | Meiotic recombination                                                                 | REACTOME_Pathways_2 5.05.2022 | 2.61E-05    | 4.46E-05                                       | 2.74E-18     | 1.92E-17[-1]                                    | Group 6    |          | 5.81                | 5.00       | [H2AC14, H2AC6, H2BC13, H3C13, H4-16]                     |
| R-HSA-9610379 | HCMV Late Events                                                                      | REACTOME_Pathways_2 5.05.2022 | 1.10E-04    | 1.30E-04                                       | 2.74E-18     | 1.92E-17[-1]                                    | Group 6    |          | 4.31                | 5.00       | [H2AC14, H2AC6, H2BC13, H3C13, H4-16]                     |
| R-HSA-9616222 | Transcriptional regulation of granulopoiesis                                          | REACTOME_Pathways_2 5.05.2022 | 3.26E-05    | 5.30E-05                                       | 2.74E-18     | 1.92E-17[-1]                                    | Group 6    |          | 5.56                | 5.00       | [H2AC14, H2AC6, H2BC13, H3C13, H4-16]                     |
| R-HSA-9645723 | Diseases of programmed cell death                                                     | REACTOME_Pathways_2 5.05.2022 | 6.23E-05    | 8.55E-05                                       | 2.74E-18     | 1.92E-17[-1]                                    | Group 6    |          | 4.85                | 5.00       | [H2AC14, H2AC6, H2BC13, H3C13, H4-16]                     |
| R-HSA-9670095 | Inhibition of DNA recombination at telomere                                           | REACTOME_Pathways_2 5.05.2022 | 8.26E-06    | 1.75E-05                                       | 2.74E-18     | 1.92E-17[-1]                                    | Group 6    |          | 7.35                | 5.00       | [ATRX, H2AC14, H2AC6, H2BC13, H4-16]                      |
| R-HSA-9710421 | Defective pyroptosis                                                                  | REACTOME_Pathways_2 5.05.2022 | 1.17E-05    | 2.41E-05                                       | 2.74E-18     | 1.92E-17[-1]                                    | Group 6    |          | 6.85                | 5.00       | [H2AC14, H2AC6, H2BC13, H3C13, H4-16]                     |
| R-HSA-977225  | Amyloid fiber formation                                                               | REACTOME_Pathways_2 5.05.2022 | 8.90E-05    | 1.09E-04                                       | 2.74E-18     | 1.92E-17[-1]                                    | Group 6    |          | 4.50                | 5.00       | [H2AC14, H2AC6, H2BC13, H3C13, H4-16]                     |

#### S1d Cont.

**Figure S1.** Detailed list of the 62 top HMGA2 interaction partners selected based on Reactome pathway algorithm. The seven groups are coded by the same color as they are depicted in Fig. 6a+b.
